# Supplementary material for: A structural study of alkaline earth metal complexes of (dichloromethylene)bisphosphonic acid P-morpholinium- and P-pyrrolidinium-P′-methyl esters
Source: Royal Society of Chemistry journal article supplement (doi:10.1039/b802668h), 2008-01-01
Supplement: b802668h.pdf [file b802668h.pdf]

# Electronic Supplementary Information (ESI) for CrystEngComm

Jonna Jokiniemi\*, Sirpa Peräniemi, Jouko. J. Vepsäläinen and Markku  
Ahlgrén

Department of Chemistry, University of Joensuu, P.O. Box 111, 80101, Joensuu,  
Finland

## List of figures (Supplementary data)

**Figure S1:**  $^{31}\text{P}$ -CP/MAS NMR spectrum of  $[\text{Mg}(\text{CH}_3\text{PO}_3\text{CCl}_2\text{PO}_2\text{NC}_4\text{H}_8\text{O})(\text{H}_2\text{O})_3]_n$  (**1**)

**Figure S2:**  $^{31}\text{P}$ -CP/MAS NMR spectrum of  $[\text{Ba}(\text{CH}_3\text{PO}_3\text{CCl}_2\text{PO}_2\text{NC}_4\text{H}_8\text{O})(\text{H}_2\text{O})_2]_n$  (**2**)

**Figure S3:**  $^{31}\text{P}$ -CP/MAS NMR spectrum of  $[\text{Sr}_2(\text{CH}_3\text{PO}_3\text{CCl}_2\text{PO}_2\text{NC}_4\text{H}_8)_2(\text{H}_2\text{O})_{3.5}]_n$  (**3**)

**Figure S4:** FT-IR spectrum of  $[\text{Mg}(\text{CH}_3\text{PO}_3\text{CCl}_2\text{PO}_2\text{NC}_4\text{H}_8\text{O})(\text{H}_2\text{O})_3]_n$  (**1**) in KBr pellet

**Figure S5:** FT-IR spectrum of  $[\text{Ba}(\text{CH}_3\text{PO}_3\text{CCl}_2\text{PO}_2\text{NC}_4\text{H}_8\text{O})(\text{H}_2\text{O})_2]_n$  (**2**) in KBr pellet

**Figure S6:** FT-IR spectrum of  $[\text{Sr}_2(\text{CH}_3\text{PO}_3\text{CCl}_2\text{PO}_2\text{NC}_4\text{H}_8)_2(\text{H}_2\text{O})_{3.5}]_n$  (**3**) in KBr pellet

**Figure S7:** A thermogravimetric curve of the starting material  $(\text{C}_4\text{H}_8\text{ONH}_2)_2\text{CH}_3\text{PO}_3\text{C}-\text{Cl}_2\text{PO}_2\text{NC}_4\text{H}_8\text{O}$  performed in nitrogen atmosphere in a temperature range of 25–600 °C and at a heating rate of 5 °C /min.

**Figure S8:** A thermogravimetric curve of the starting material  $(\text{C}_4\text{H}_8\text{NH}_2)_2\text{CH}_3\text{PO}_3\text{C}-\text{Cl}_2\text{PO}_2\text{NC}_4\text{H}_8$  performed in nitrogen atmosphere in a temperature range of 25–600 °C and at a heating rate of 5 °C /min.

**Figure S9:** A thermogravimetric curve of  $[\text{Mg}(\text{CH}_3\text{PO}_3\text{CCl}_2\text{PO}_2\text{NC}_4\text{H}_8\text{O})(\text{H}_2\text{O})_3]_n$  (**1**) performed under synthetic air in a temperature range of 25–700 °C and at a heating rate of 5 °C /min.

**Figure S10:** A thermogravimetric curve of  $[\text{Ba}(\text{CH}_3\text{PO}_3\text{CCl}_2\text{PO}_2\text{NC}_4\text{H}_8\text{O})(\text{H}_2\text{O})_2]_n$  (**2**) performed under synthetic air in a temperature range of 25–900 °C and at a heating rate of 5 °C /min.

**Figure S11:** A thermogravimetric curve of  $[\text{Sr}_2(\text{CH}_3\text{PO}_3\text{CCl}_2\text{PO}_2\text{NC}_4\text{H}_8)_2(\text{H}_2\text{O})_{3.5}]_n$  (**3**) performed under synthetic air in a temperature range of 25–900 °C and at a heating rate of 5 °C /min.

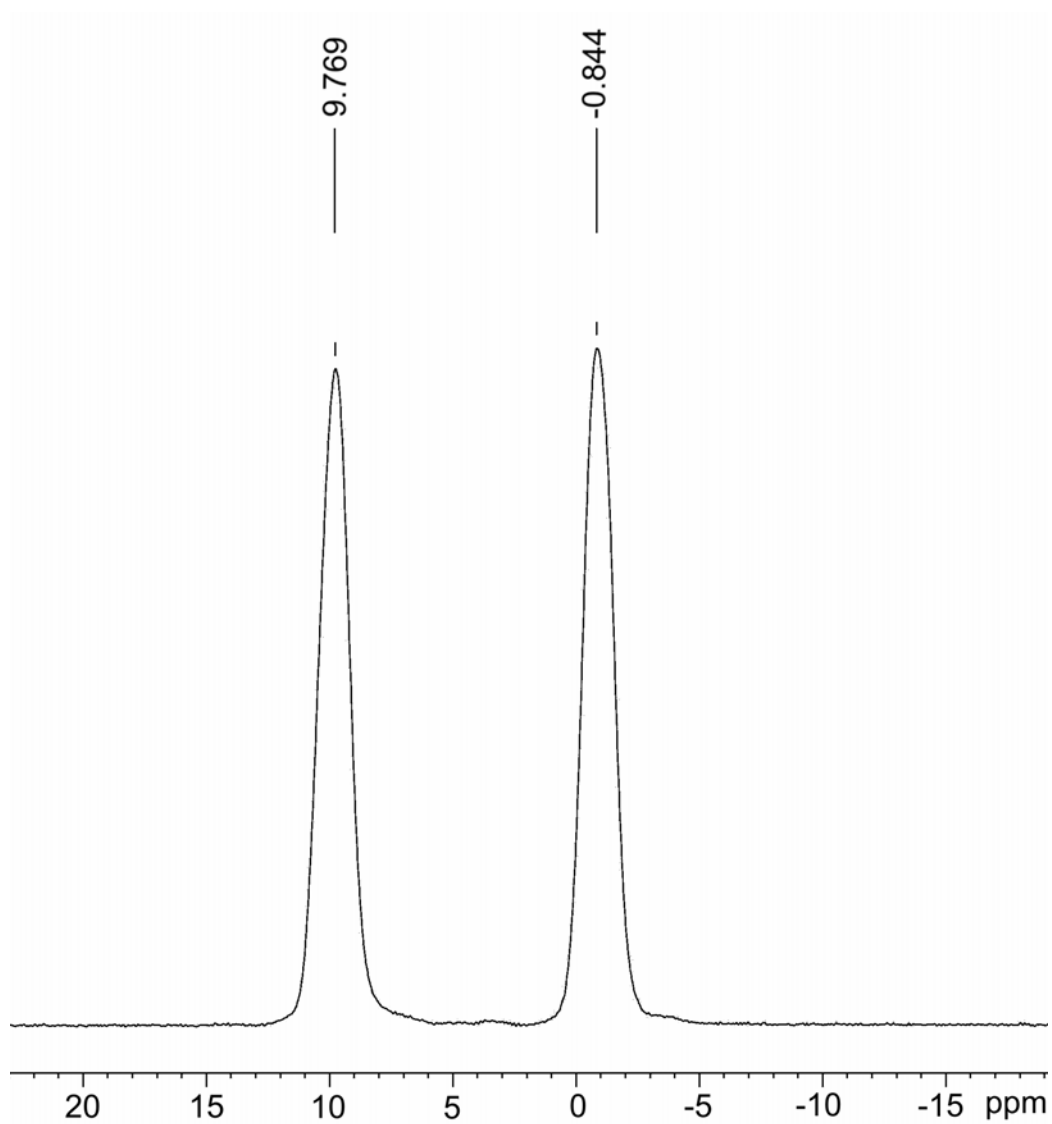

**Figure S1:**  $^{31}\text{P}$ -CP/MAS NMR spectrum of  $[\text{Mg}(\text{CH}_3\text{PO}_3\text{CCl}_2\text{PO}_2\text{NC}_4\text{H}_8\text{O})(\text{H}_2\text{O})_3]_n$  (**1**).

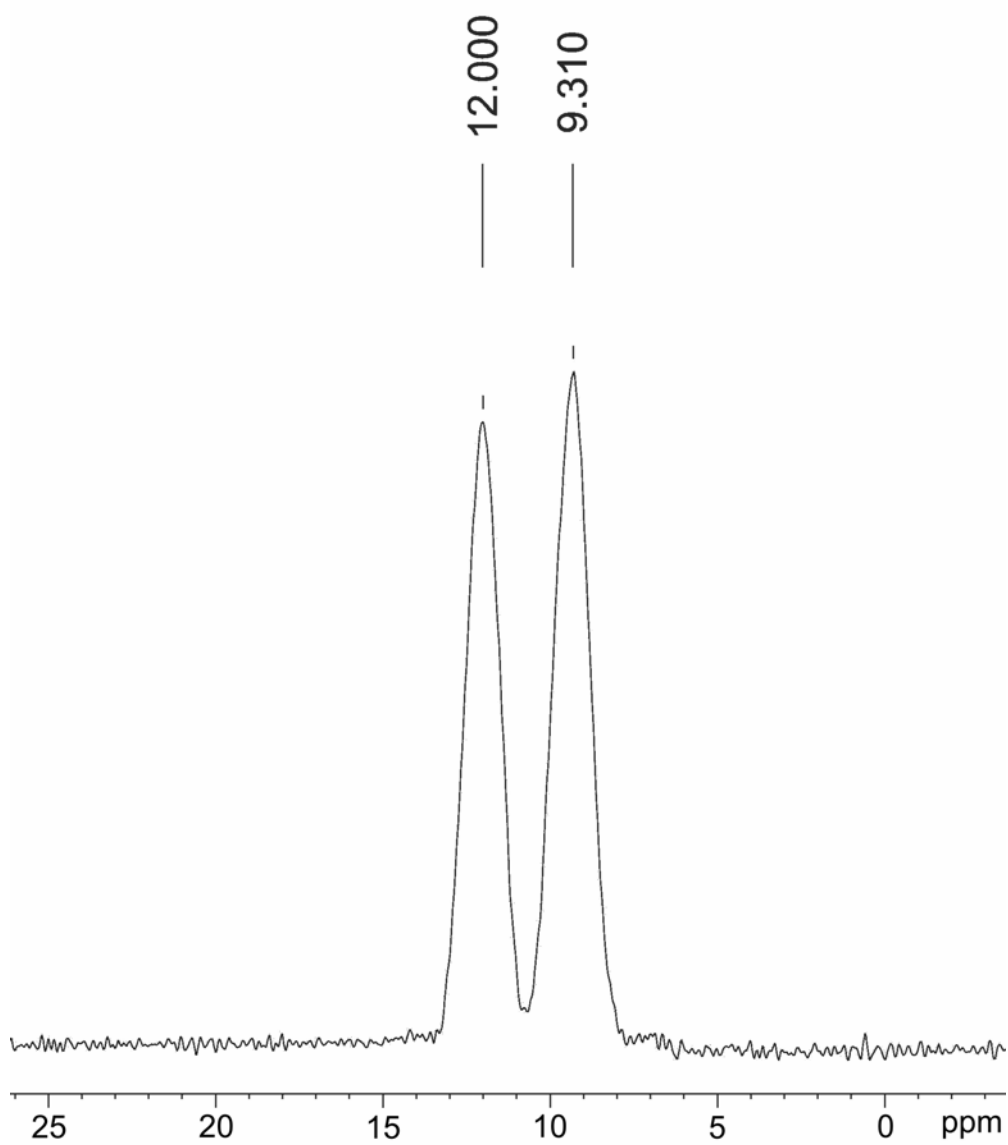

**Figure S2:**  $^{31}\text{P}$ -CP/MAS NMR spectrum of  $[\text{Ba}(\text{CH}_3\text{PO}_3\text{CCl}_2\text{PO}_2\text{NC}_4\text{H}_8\text{O})(\text{H}_2\text{O})_2]_n$  (**2**).

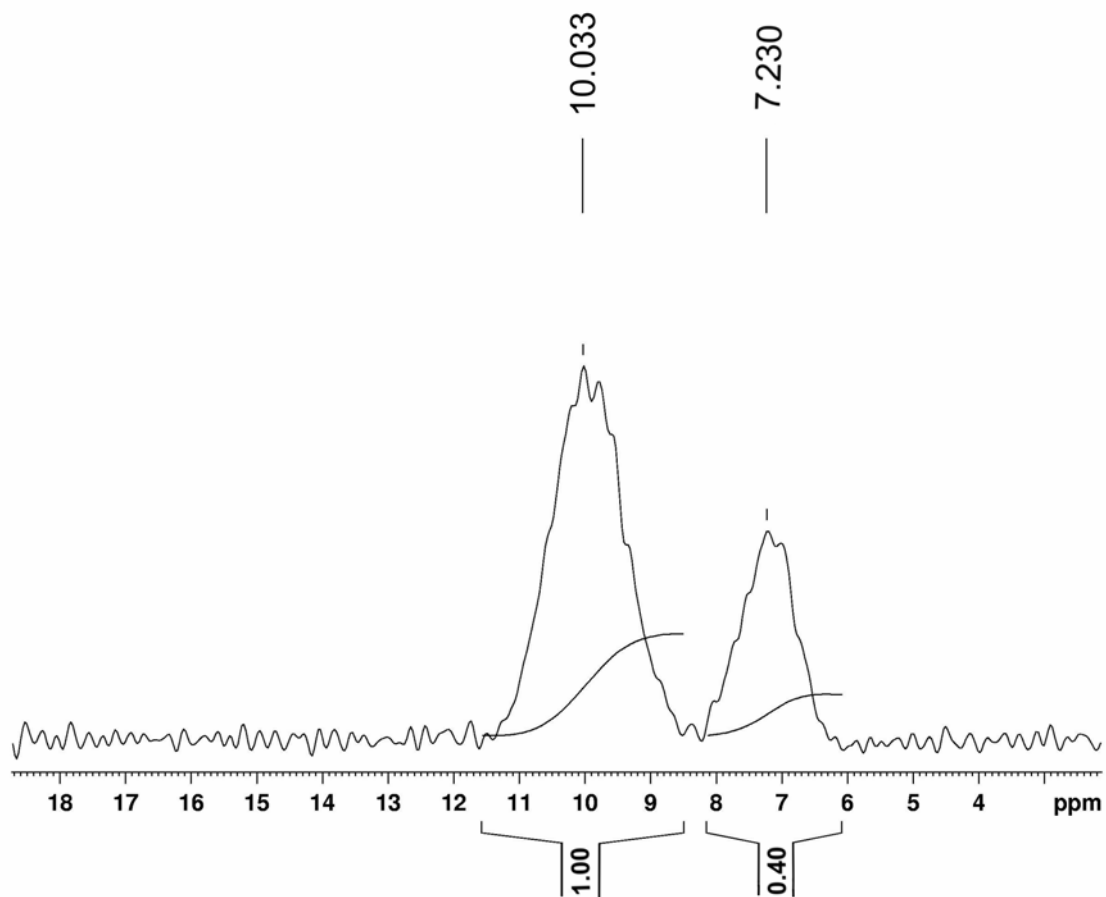

**Figure S3:**  $^{31}\text{P}$ -CP/MAS NMR spectrum of  $[\text{Sr}_2(\text{CH}_3\text{PO}_3\text{CCl}_2\text{PO}_2\text{NC}_4\text{H}_8)_2(\text{H}_2\text{O})_{3.5}]_n$  (**3**).

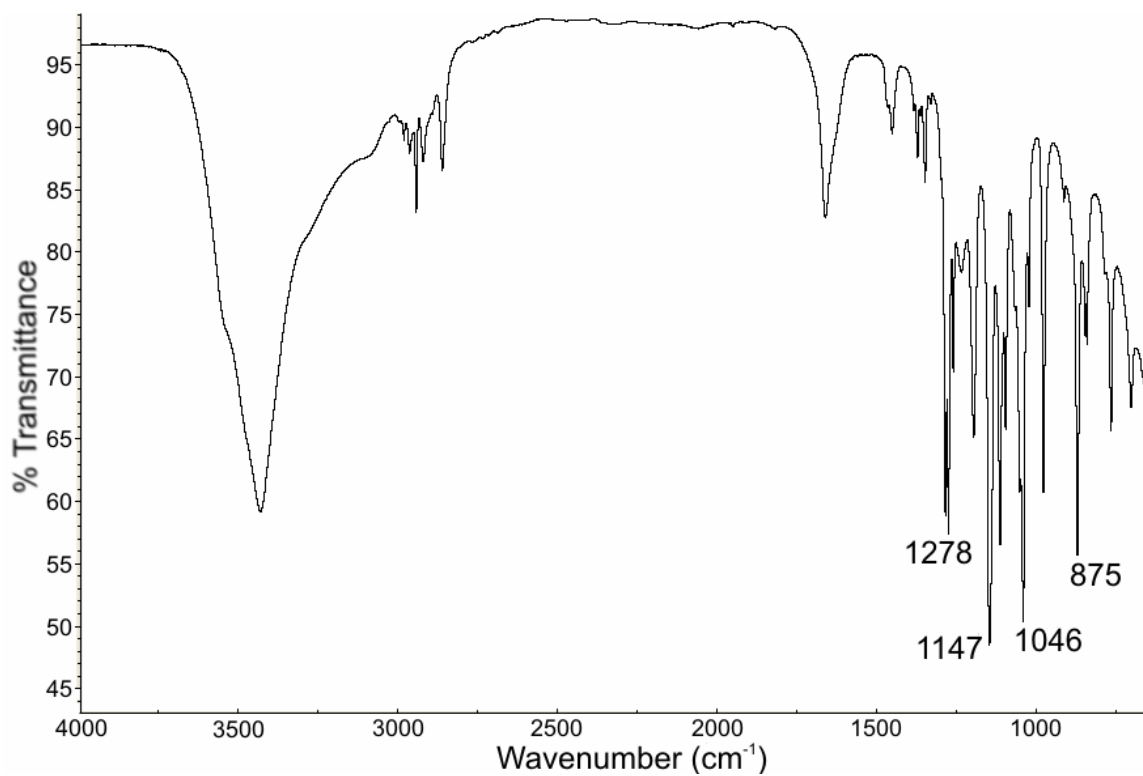

**Figure S4:** FT-IR spectrum of  $[\text{Mg}(\text{CH}_3\text{PO}_3\text{CCl}_2\text{PO}_2\text{NC}_4\text{H}_8\text{O})(\text{H}_2\text{O})_3]_n$  (**1**) in KBr pellet.

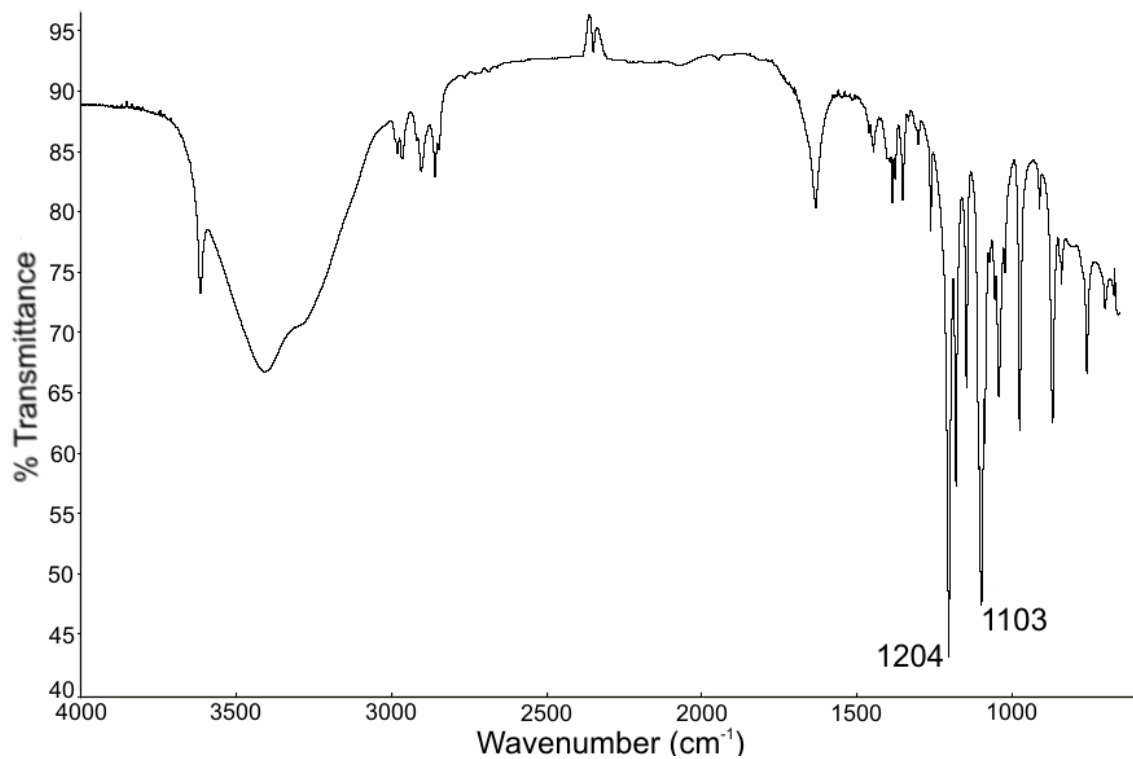

**Figure S5:** FT-IR spectrum of  $[\text{Ba}(\text{CH}_3\text{PO}_3\text{CCl}_2\text{PO}_2\text{NC}_4\text{H}_8\text{O})(\text{H}_2\text{O})_2]_n$  (**2**) in KBr pellet.

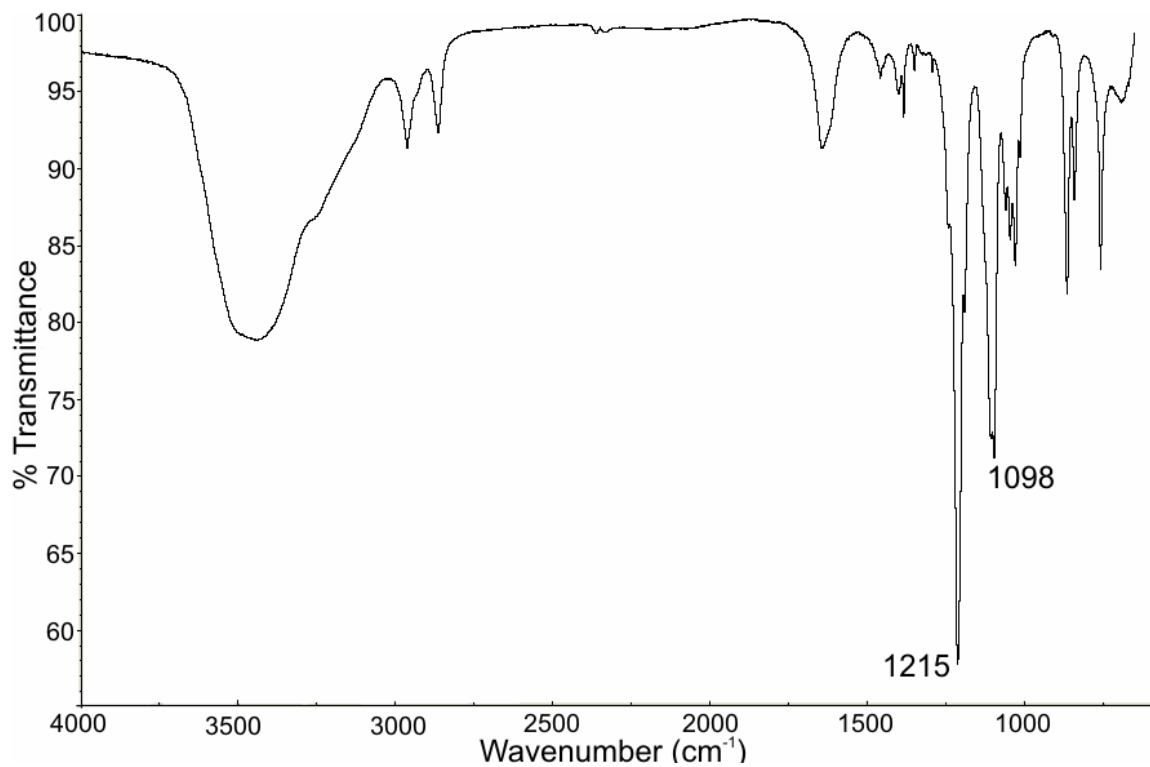

**Figure S6:** FT-IR spectrum of  $[\text{Sr}_2(\text{CH}_3\text{PO}_3\text{CCl}_2\text{PO}_2\text{NC}_4\text{H}_8)_2(\text{H}_2\text{O})_{3.5}]_n$  (**3**) in KBr pellet.

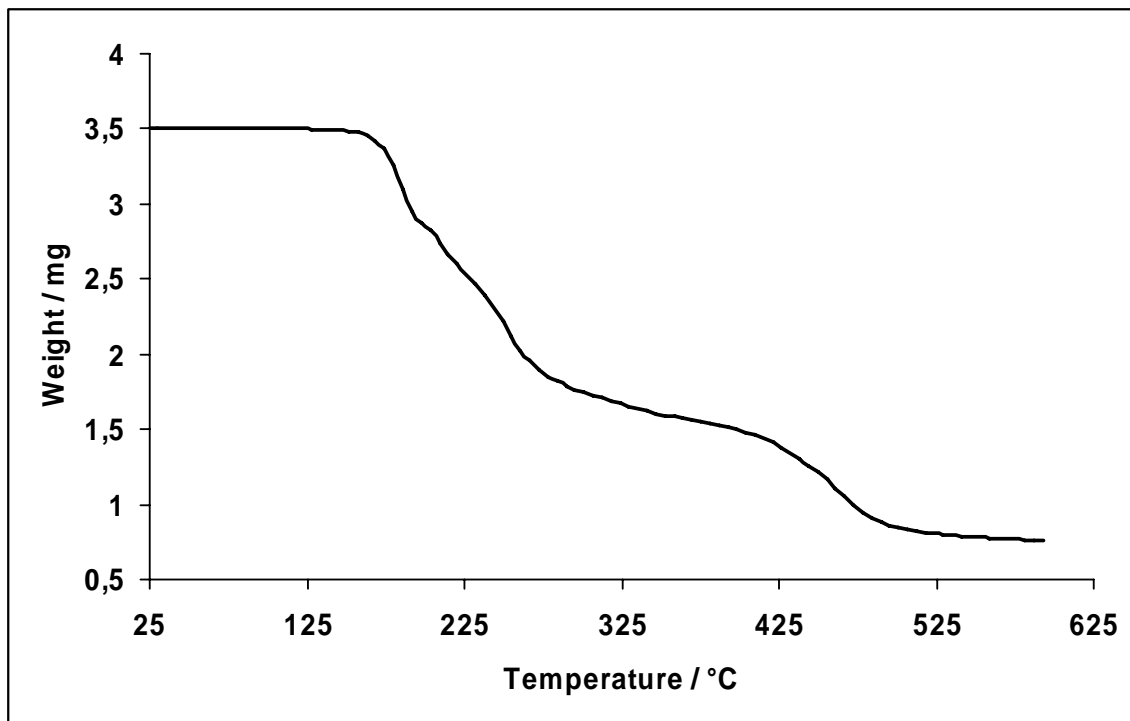

**Figure S7:** A thermogravimetric curve of the starting material  $(\text{C}_4\text{H}_8\text{ONH}_2)_2\text{CH}_3\text{PO}_3\text{C}-\text{Cl}_2\text{PO}_2\text{NC}_4\text{H}_8\text{O}$  performed in nitrogen atmosphere in a temperature range of 25–600 °C and at a heating rate of 5 °C /min.



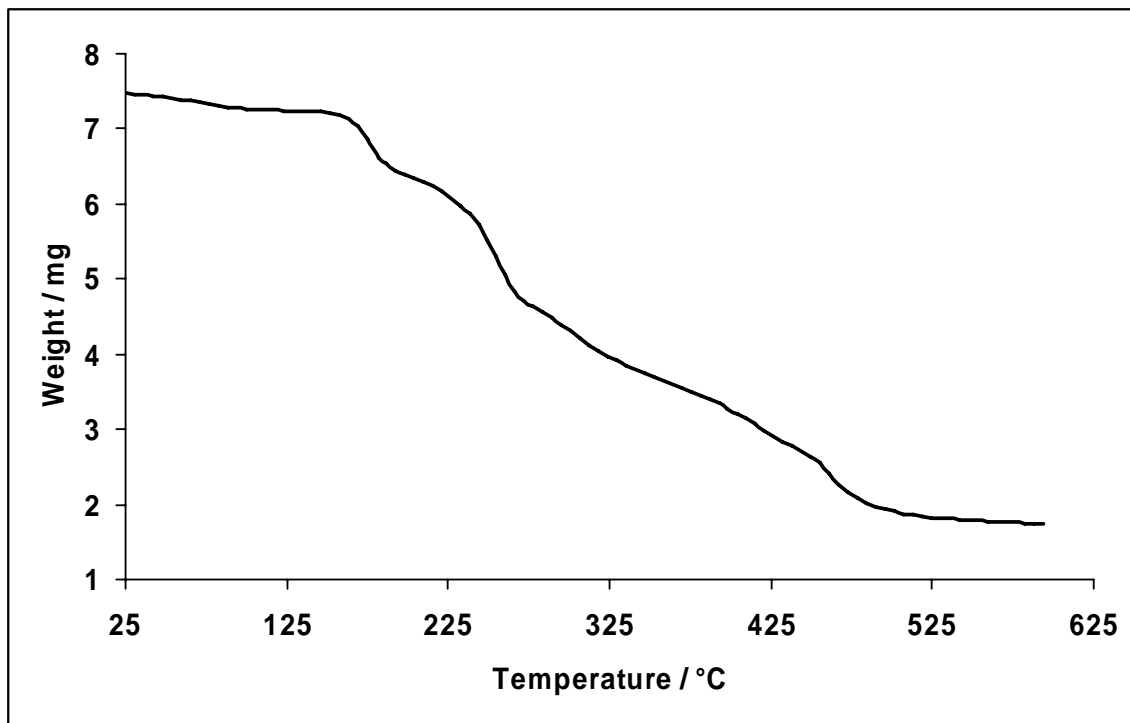

**Figure S8:** A thermogravimetric curve of the starting material  $(C_4H_8NH_2)_2CH_3PO_3C-Cl_2PO_2NC_4H_8$  performed in nitrogen atmosphere in a temperature range of 25–600 °C and at a heating rate of 5 °C /min.

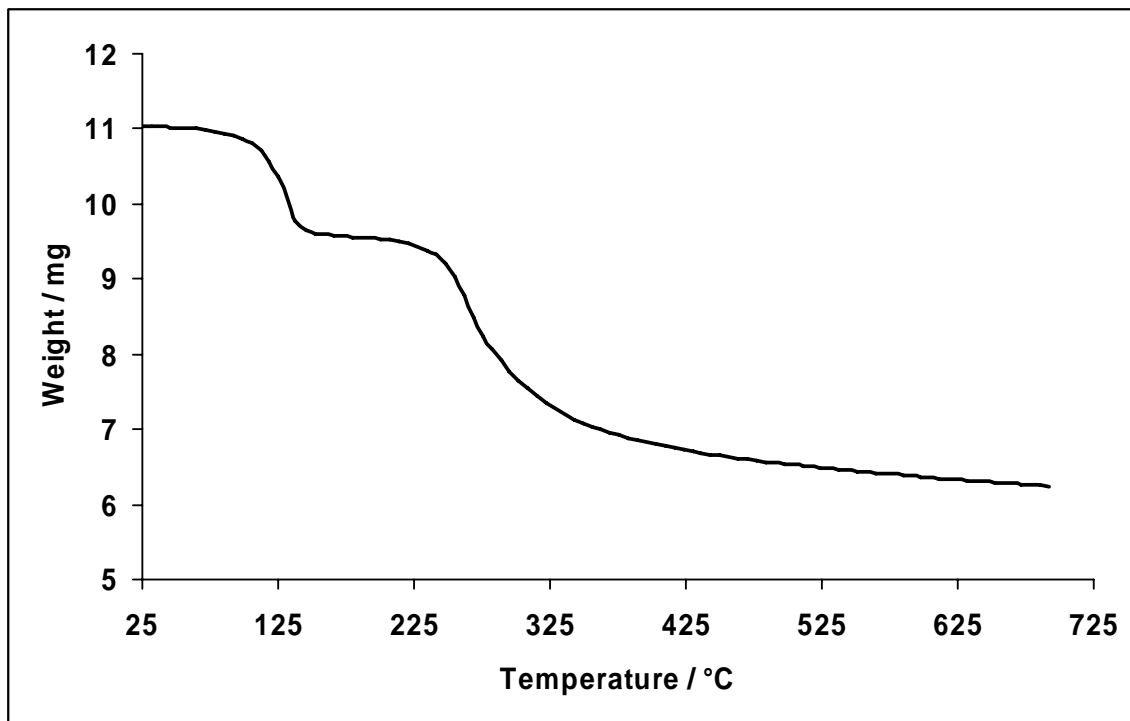

**Figure S9:** A thermogravimetric curve of  $[\text{Mg}(\text{CH}_3\text{PO}_3\text{CCl}_2\text{PO}_2\text{NC}_4\text{H}_8\text{O})(\text{H}_2\text{O})_3]_n$  (**1**) performed under synthetic air in a temperature range of 25–700 °C and at a heating rate of 5 °C /min.

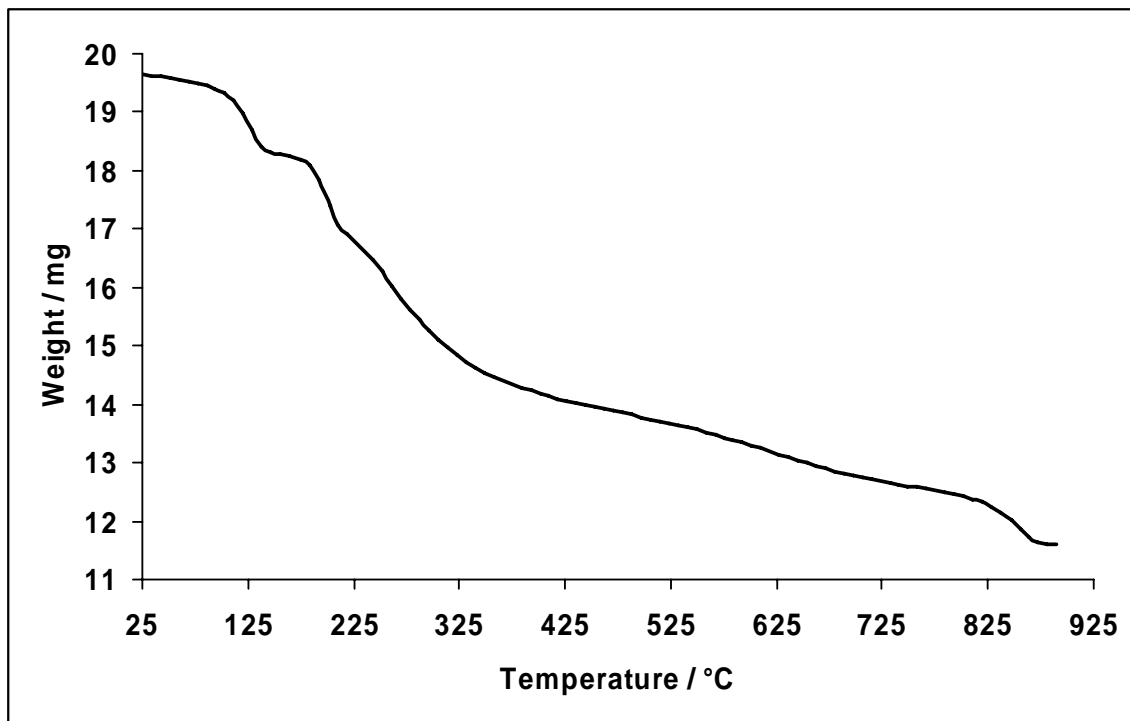

**Figure S10:** A thermogravimetric curve of  $[\text{Ba}(\text{CH}_3\text{PO}_3\text{CCl}_2\text{PO}_2\text{NC}_4\text{H}_8\text{O})(\text{H}_2\text{O})_2]_n$  (**2**) performed under synthetic air in a temperature range of 25–900 °C and at a heating rate of 5 °C /min.

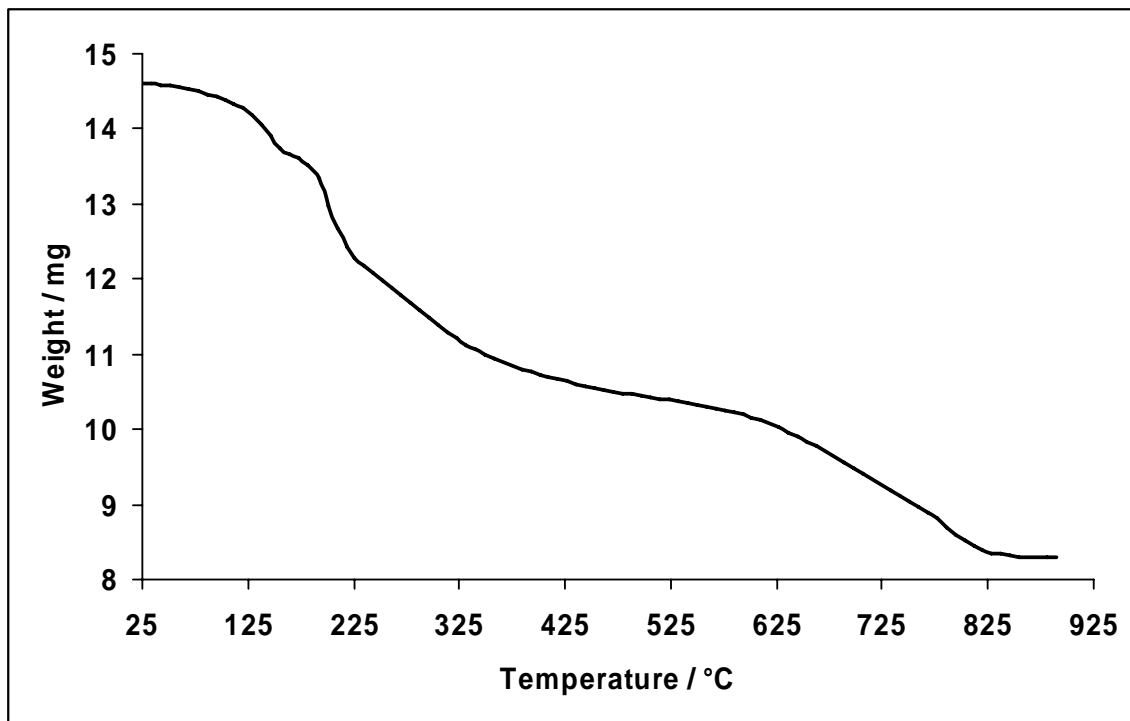

**Figure S11:** A thermogravimetric curve of  $[\text{Sr}_2(\text{CH}_3\text{PO}_3\text{CCl}_2\text{PO}_2\text{NC}_4\text{H}_8)_2(\text{H}_2\text{O})_{3.5}]_n$  (**3**) performed under synthetic air in a temperature range of 25–900 °C and at a heating rate of 5 °C /min.
